# Supplementary material
Source: Springer Nature journal article supplement (https://www.springermedizin.de/resource/supplementary/12985_2010_861_MOESM4_ESM.pdf/9608610)

Negative control

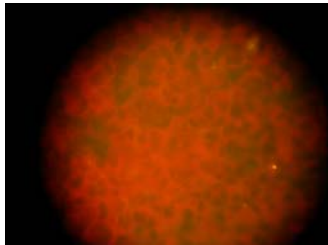

Wild-type virus

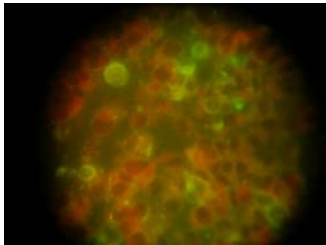

Rescued virus

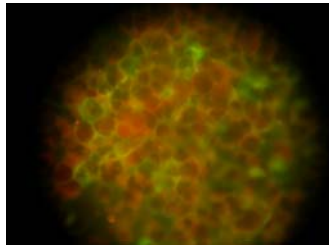

Supplement: MOESM4 [file 9608610]
